# Supplementary material
Source: publisher site journal article supplement (https://www.dovepress.com/article/313789)

## Supplementary File

**Supplementary Table 1** Characteristics by phenotype (analysis A: treatment time from onset of symptoms)

|                                              | Classical (n=242) |                    |                     | Late-onset (n=53) |                   |                    |
|----------------------------------------------|-------------------|--------------------|---------------------|-------------------|-------------------|--------------------|
|                                              | Prompt<br>(n=18)  | Delayed<br>(n=224) | P-value             | Prompt<br>(n=15)  | Delayed<br>(n=38) | P-value            |
| Sex, n (%)                                   |                   |                    |                     |                   |                   |                    |
| N                                            | 18                | 224                |                     | 15                | 38                |                    |
| Male                                         | 10 (55.6)         | 128 (57.1)         | 0.896 <sup>a</sup>  | 13 (86.7)         | 29 (76.3)         | 0.403 <sup>a</sup> |
| Female                                       | 8 (44.4)          | 96 (42.9)          |                     | 2 (13.3)          | 9 (23.7)          |                    |
| Age at symptom onset, years                  |                   |                    |                     |                   |                   |                    |
| N                                            | 18                | 224                |                     | 15                | 38                |                    |
| Mean (SD)                                    | 30.3 (15.2)       | 16.7 (13.9)        | <0.001 <sup>b</sup> | 54.4 (8.4)        | 43.7 (17.1)       | 0.025 <sup>b</sup> |
| Age at diagnosis, years                      |                   |                    |                     |                   |                   |                    |
| N                                            | 18                | 221                |                     | 15                | 38                |                    |
| Mean (SD)                                    | 29.1 (16.9)       | 29.8 (16.6)        | 0.870 <sup>b</sup>  | 54.3 (8.5)        | 54.6 (14.9)       | 0.935 <sup>b</sup> |
| Age at treatment initiation, years           |                   |                    |                     |                   |                   |                    |
| N                                            | 18                | 224                |                     | 15                | 38                |                    |
| Mean (SD)                                    | 31.2 (15.4)       | 39.1 (14.8)        | 0.030 <sup>b</sup>  | 55.3 (8.7)        | 57.1 (13.9)       | 0.646 <sup>b</sup> |
| Symptom onset to treatment initiation, years |                   |                    |                     |                   |                   |                    |
| N                                            | 18                | 224                |                     | 15                | 38                |                    |
| Mean (SD)                                    | 0.9 (0.5)         | 22.4 (13.1)        | <0.001 <sup>b</sup> | 0.9 (0.6)         | 13.4 (15.0)       | 0.002 <sup>b</sup> |
| Diagnosis to treatment initiation, years     |                   |                    |                     |                   |                   |                    |
| N                                            | 18                | 221                |                     | 15                | 38                |                    |
| Mean (SD)                                    | 2.1 (2.7)         | 9.3 (11.4)         | 0.008 <sup>b</sup>  | 1.0 (0.5)         | 2.5 (2.7)         | 0.047 <sup>b</sup> |
| Symptom onset to diagnosis, years            |                   |                    |                     |                   |                   |                    |
| N                                            | 18                | 221                |                     | 15                | 38                |                    |
| Mean (SD)                                    | 0.3 (0.5)         | 13.5 (13.4)        | <0.001 <sup>b</sup> | 0.1 (0.4)         | 11.2 (14.4)       | 0.005 <sup>b</sup> |
| eGFR at baseline, mL/min/1.73m <sup>2</sup>  |                   |                    |                     |                   |                   |                    |
| N                                            | 13                | 142                |                     | 13                | 30                |                    |
| Mean (SD)                                    | 94.3 (31.2)       | 93.3 (30.6)        | 0.913 <sup>b</sup>  | 88.6 (10.5)       | 88.1 (21.2)       | 0.941 <sup>b</sup> |
| LVMI at baseline, g/m <sup>2.7</sup>         |                   |                    |                     |                   |                   |                    |
| N                                            | 5                 | 88                 |                     | 8                 | 18                |                    |
| Mean (SD)                                    | 50.2 (14.5)       | 51.7 (16.7)        | 0.848 <sup>b</sup>  | 64.6 (25.5)       | 63.4 (26.0)       | 0.913 <sup>b</sup> |

|                                  |           |            |                    |           |           |                    |
|----------------------------------|-----------|------------|--------------------|-----------|-----------|--------------------|
| History of cardiovascular events |           |            |                    |           |           |                    |
| N                                | 18        | 224        |                    | 15        | 38        |                    |
| Yes, n (%)                       | 4 (22.2)  | 125 (55.8) | 0.006 <sup>a</sup> | 11 (73.3) | 30 (78.9) | 0.660 <sup>a</sup> |
| History of renal events          |           |            |                    |           |           |                    |
| N                                | 18        | 224        |                    | 15        | 38        |                    |
| Yes, n (%)                       | 3 (16.7)  | 95 (42.4)  | 0.032 <sup>a</sup> | 0         | 4 (10.5)  | 0.191 <sup>a</sup> |
| Family history                   |           |            |                    |           |           |                    |
| N                                | 17        | 207        |                    | 14        | 36        |                    |
| Yes, n (%)                       | 15 (88.2) | 194 (93.7) | 0.384 <sup>a</sup> | 12 (85.7) | 31 (86.1) | 0.971 <sup>a</sup> |

The prompt treatment cohort initiated agalsidase alfa <24 months after symptom onset; the delayed treatment cohort initiated agalsidase alfa ≥24 months after symptom onset. Baseline was defined as the date closest to agalsidase alfa initiation within a window of –6 months to +3 months. eGFR was calculated using the Chronic Kidney Disease Epidemiology Collaboration. Values were restricted to 10–160 mL/min/1.73 m<sup>2</sup> for eGFR and 10–120 g/m<sup>2.7</sup> for LVMI; values outside these ranges were considered missing. History of cardiovascular and/or renal events refers to respective events that occurred prior to or at the date of agalsidase alfa initiation. *P*-values were derived from <sup>a</sup>Chi-square test and <sup>b</sup>*t* test.

Mutation classification was reported for patients both with genetic informed consent form and who provided genetic data.

**Abbreviations:** eGFR, estimated glomerular filtration rate; LVMI, left ventricular mass index.

**Supplementary Table 2** Characteristics by phenotype (analysis B: treatment time from diagnosis)

|                                              | Classical (n=349) |                    |                     | Late-onset (n=96) |                   |                     |
|----------------------------------------------|-------------------|--------------------|---------------------|-------------------|-------------------|---------------------|
|                                              | Prompt<br>(n=152) | Delayed<br>(n=197) | <i>P</i> -value     | Prompt<br>(n=72)  | Delayed<br>(n=24) | <i>P</i> -value     |
| Sex, n (%)                                   |                   |                    |                     |                   |                   |                     |
| N                                            | 152               | 197                |                     | 72                | 24                |                     |
| Male                                         | 82 (53.9)         | 97 (49.2)          | 0.383 <sup>a</sup>  | 59 (81.9)         | 16 (66.7)         | 0.117 <sup>a</sup>  |
| Female                                       | 70 (46.1)         | 100 (50.8)         |                     | 13 (18.1)         | 8 (33.3)          |                     |
| Age at symptom onset, years                  |                   |                    |                     |                   |                   |                     |
| N                                            | 102               | 137                |                     | 38                | 15                |                     |
| Mean (SD)                                    | 18.1 (14.3)       | 17.4 (14.6)        | 0.700 <sup>b</sup>  | 52.0 (9.2)        | 33.4 (21.1)       | <0.001 <sup>b</sup> |
| Age at diagnosis, years                      |                   |                    |                     |                   |                   |                     |
| N                                            | 152               | 197                |                     | 72                | 24                |                     |
| Mean (SD)                                    | 37.8 (15.7)       | 27.1 (16.9)        | <0.001 <sup>b</sup> | 57.8 (9.8)        | 45.5 (17.9)       | <0.001 <sup>b</sup> |
| Age at treatment initiation, years           |                   |                    |                     |                   |                   |                     |
| N                                            | 152               | 197                |                     | 72                | 24                |                     |
| Mean (SD)                                    | 38.6 (15.8)       | 40.1 (15.9)        | 0.391 <sup>b</sup>  | 58.8 (9.8)        | 50.7 (17.3)       | 0.005 <sup>b</sup>  |
| Symptom onset to treatment initiation, years |                   |                    |                     |                   |                   |                     |
| N                                            | 102               | 137                |                     | 38                | 15                |                     |
| Mean (SD)                                    | 18.8 (14.5)       | 22.3 (13.3)        | 0.056 <sup>b</sup>  | 7.3 (8.2)         | 16.5 (21.7)       | 0.028 <sup>b</sup>  |
| Diagnosis to treatment initiation, years     |                   |                    |                     |                   |                   |                     |
| N                                            | 152               | 197                |                     | 72                | 24                |                     |
| Mean (SD)                                    | 0.8 (0.5)         | 13.0 (11.2)        | <0.001 <sup>b</sup> | 1.0 (0.4)         | 5.1 (3.0)         | <0.001 <sup>b</sup> |
| Symptom onset to diagnosis, years            |                   |                    |                     |                   |                   |                     |
| N                                            | 102               | 137                |                     | 38                | 15                |                     |
| Mean (SD)                                    | 18.0 (14.4)       | 8.4 (10.9)         | <0.001 <sup>b</sup> | 6.4 (8.1)         | 12.3 (20.9)       | 0.140 <sup>b</sup>  |
| eGFR at baseline, mL/min/1.73m <sup>2</sup>  |                   |                    |                     |                   |                   |                     |
| N                                            | 88                | 128                |                     | 56                | 19                |                     |
| Mean (SD)                                    | 92.3 (31.1)       | 95.4 (28.9)        | 0.453 <sup>b</sup>  | 81.9 (18.0)       | 94.8 (26.6)       | 0.021 <sup>b</sup>  |
| LVMI at baseline, g/m <sup>2.7</sup>         |                   |                    |                     |                   |                   |                     |
| N                                            | 48                | 73                 |                     | 37                | 11                |                     |
| Mean (SD)                                    | 52.8 (18.0)       | 50.1 (16.3)        | 0.386 <sup>b</sup>  | 63.9 (23.1)       | 52.8 (22.8)       | 0.168 <sup>b</sup>  |
| History of cardiovascular events             |                   |                    |                     |                   |                   |                     |
| N                                            | 152               | 197                |                     | 72                | 24                |                     |

|                         |            |            |                     |           |           |                    |
|-------------------------|------------|------------|---------------------|-----------|-----------|--------------------|
| Yes, n (%)              | 63 (41.4)  | 123 (62.4) | <0.001 <sup>a</sup> | 58 (80.6) | 18 (75.0) | 0.562 <sup>a</sup> |
| History of renal events |            |            |                     |           |           |                    |
| N                       | 152        | 197        |                     | 72        | 24        |                    |
| Yes, n (%)              | 48 (31.6)  | 85 (43.1)  | 0.027 <sup>a</sup>  | 7 (9.7)   | 4 (16.7)  | 0.355 <sup>a</sup> |
| Family history          |            |            |                     |           |           |                    |
| N                       | 145        | 175        |                     | 69        | 22        |                    |
| Yes, n (%)              | 132 (91.0) | 164 (93.7) | 0.365 <sup>a</sup>  | 61 (88.4) | 20 (90.9) | 0.744 <sup>a</sup> |

The prompt treatment cohort initiated agalsidase alfa <24 months after symptom onset; the delayed treatment cohort initiated agalsidase alfa ≥24 months after symptom onset. Baseline was defined as the date closest to agalsidase alfa initiation within a window of –6 months to +3 months. eGFR was calculated using the Chronic Kidney Disease Epidemiology Collaboration. Values were restricted to 10–160 mL/min/1.73 m<sup>2</sup> for eGFR and 10–120 g/m<sup>2.7</sup> for LVMI; values outside these ranges were considered missing. History of cardiovascular and/or renal events refers to respective events that occurred prior to or at the date of agalsidase alfa initiation. *P*-values were derived from <sup>a</sup>Chi-square test and <sup>b</sup>*t* test. Mutation classification was reported for patients both with genetic informed consent form and who provided genetic data.

**Abbreviations:** eGFR, estimated glomerular filtration rate; LVMI, left ventricular mass index.

**Supplemental Figure 1.** Kaplan-Meier curves with log-rank test showing time to first cardiovascular event according to prompt/delayed agalsidase alfa initiation in male patients (analysis A: treatment time from onset of symptoms).

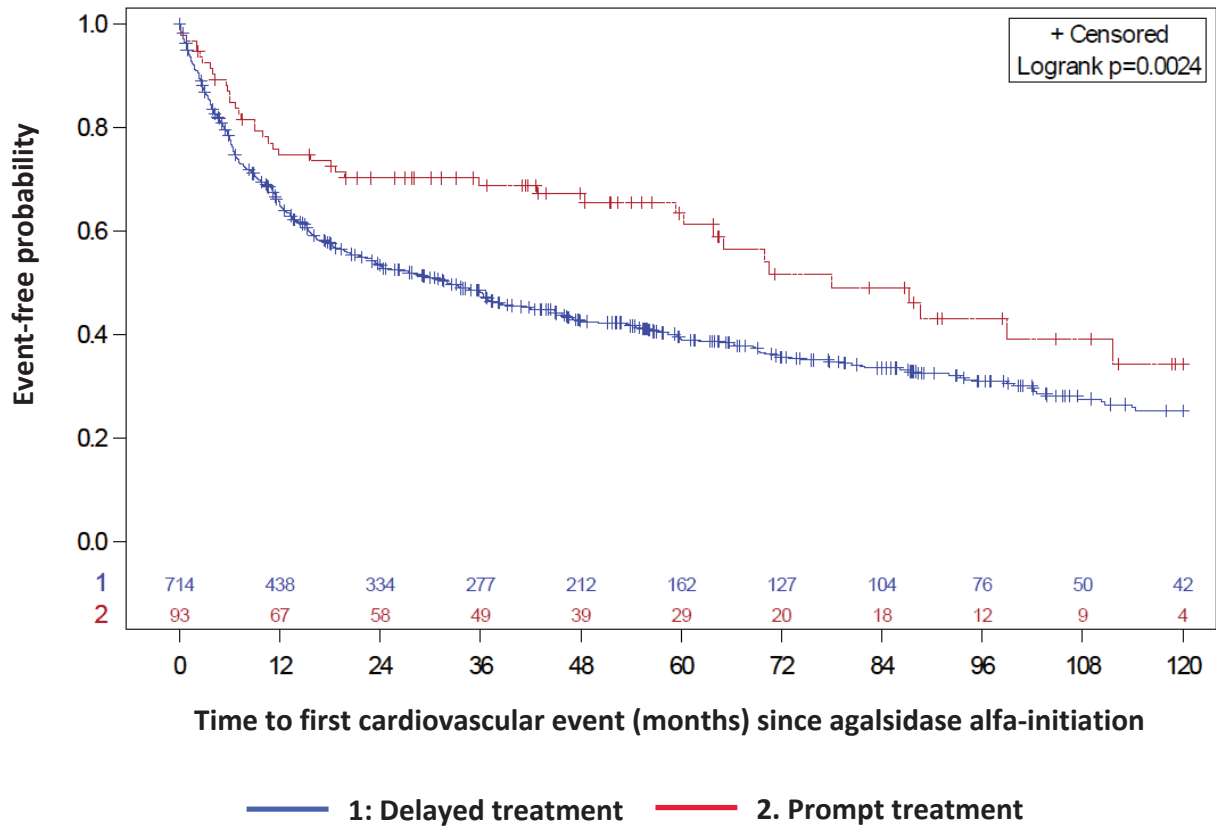

**Supplemental Figure 2.** Kaplan-Meier curves with log-rank test showing time to first cardiovascular event according to prompt/delayed agalsidase alfa initiation in female patients (analysis A: treatment time from onset of symptoms).

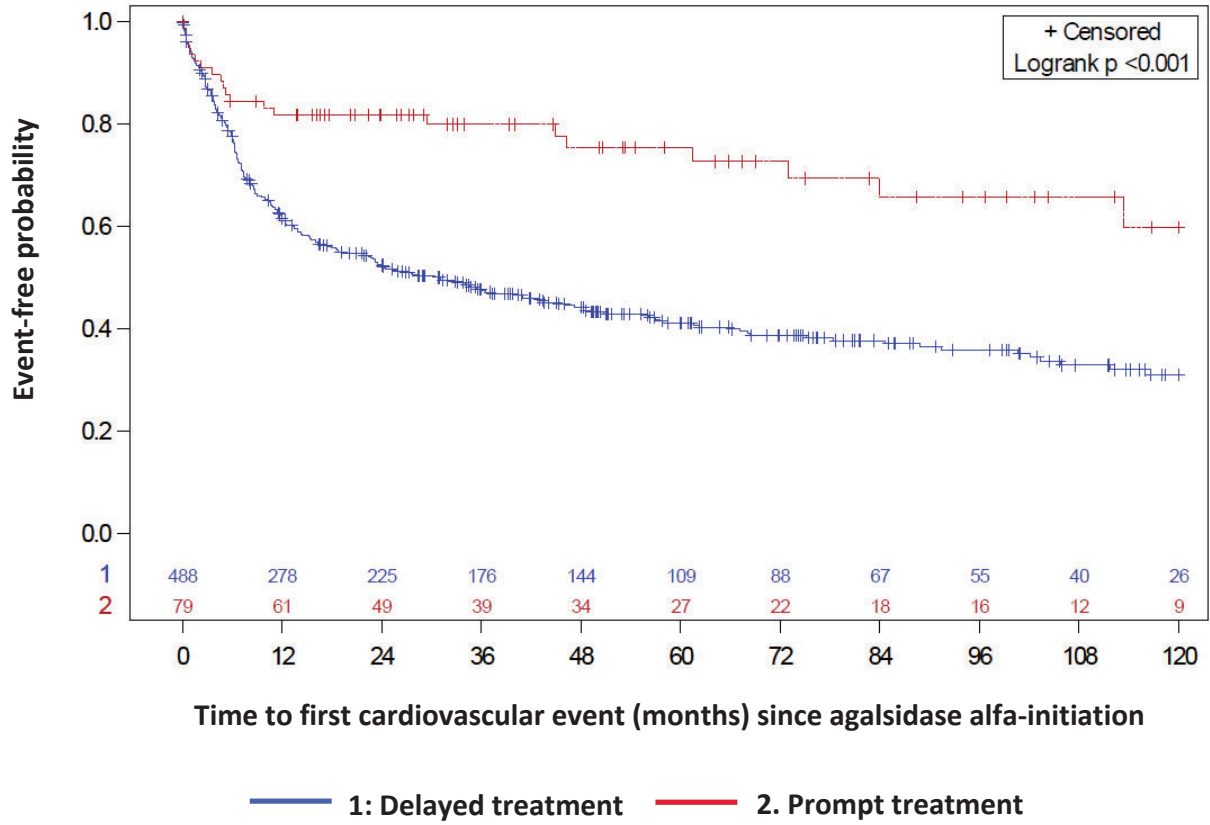

**Supplemental Figure 3.** Kaplan-Meier curves with log-rank test showing time to first renal event according to prompt/delayed agalsidase alfa initiation in male patients (analysis A: treatment time from onset of symptoms).

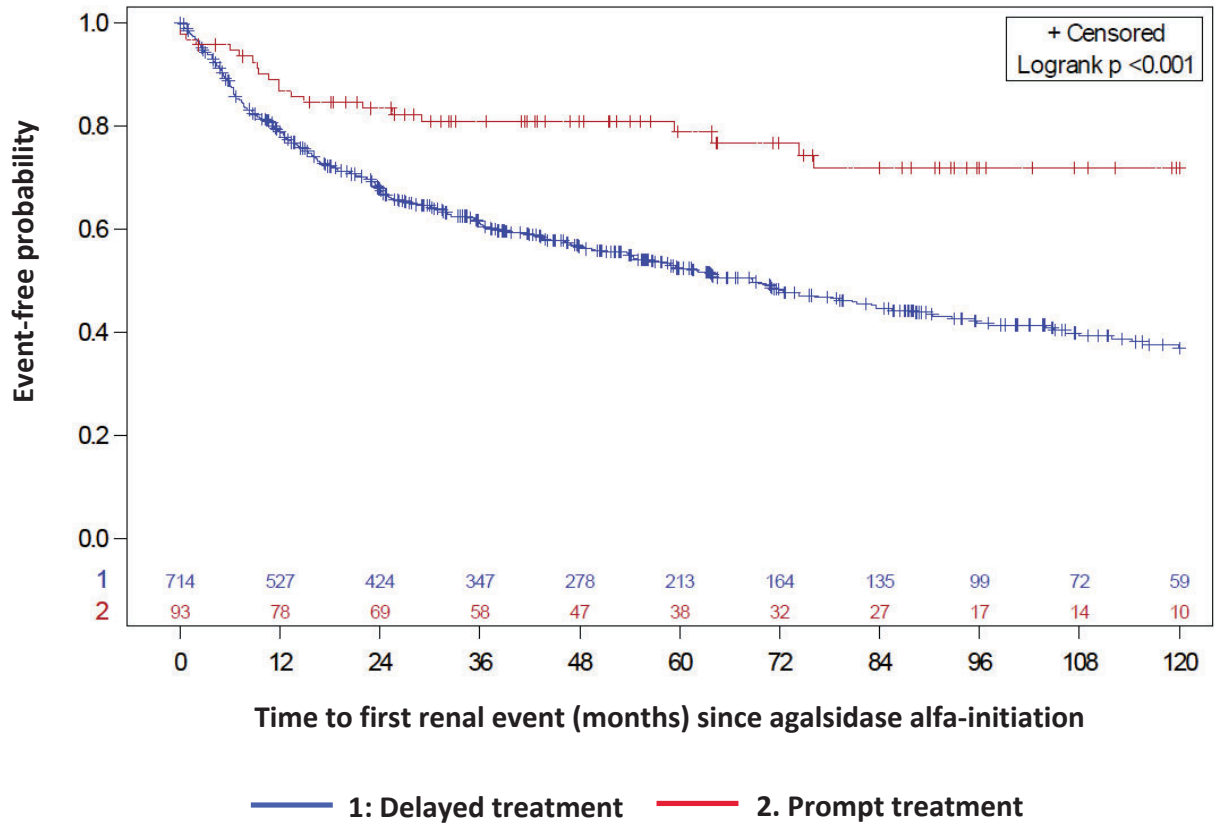

**Supplemental Figure 4.** Kaplan-Meier curves with log-rank test showing time to first renal event according to prompt/delayed agalsidase alfa initiation in female patients (analysis A: treatment time from onset of symptoms).

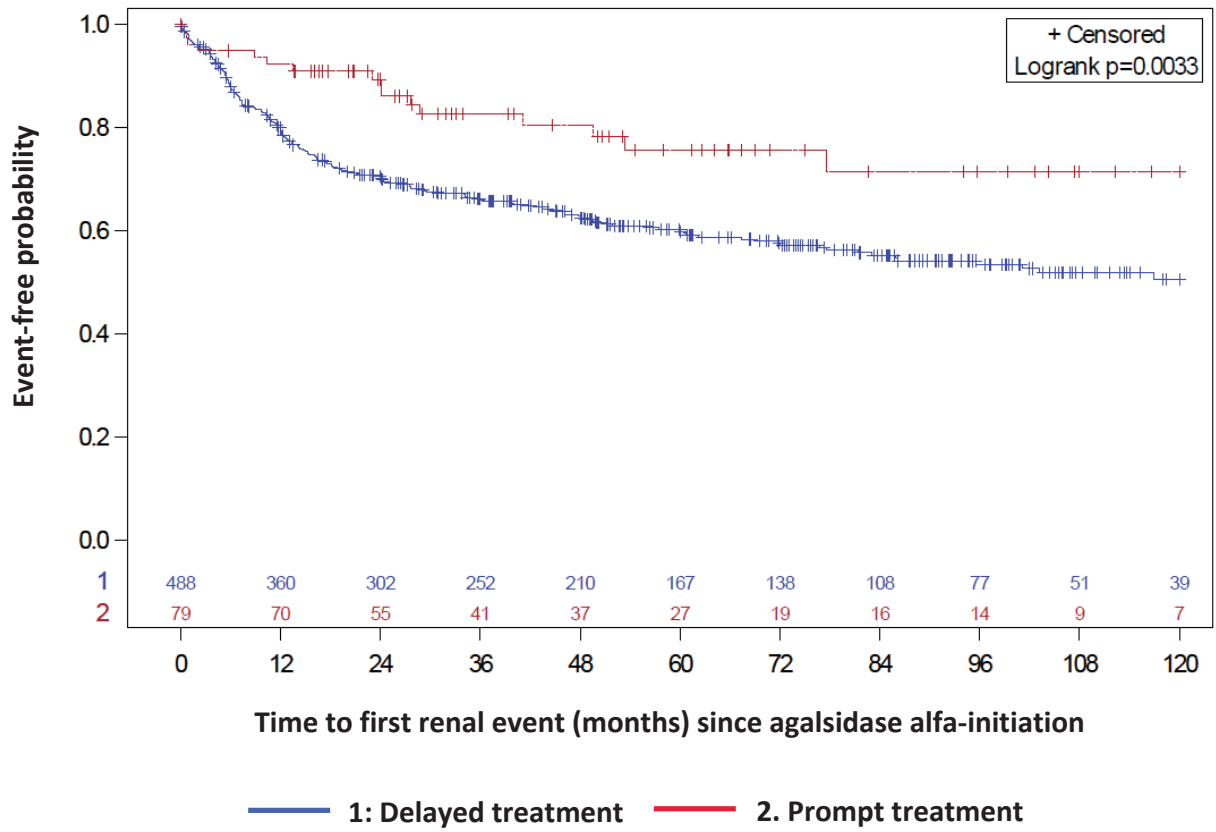



**Supplemental Figure 5.** Kaplan-Meier curves with log-rank test showing time to first cardiovascular event according to prompt/delayed agalsidase alfa initiation in male patients (analysis B: treatment time from diagnosis).

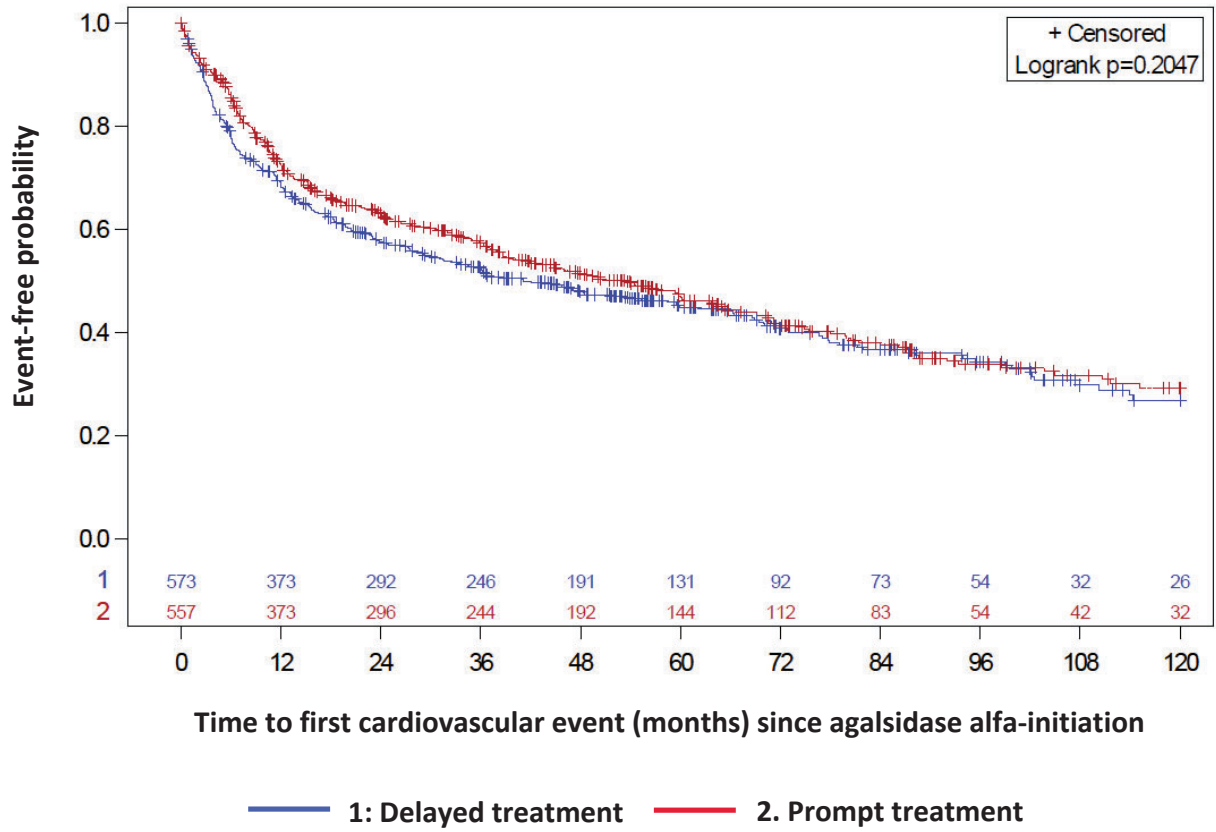

**Supplemental Figure 6.** Kaplan-Meier curves with log-rank test showing time to first cardiovascular event according to prompt/delayed agalsidase alfa initiation in female patients (analysis B: treatment time from diagnosis).

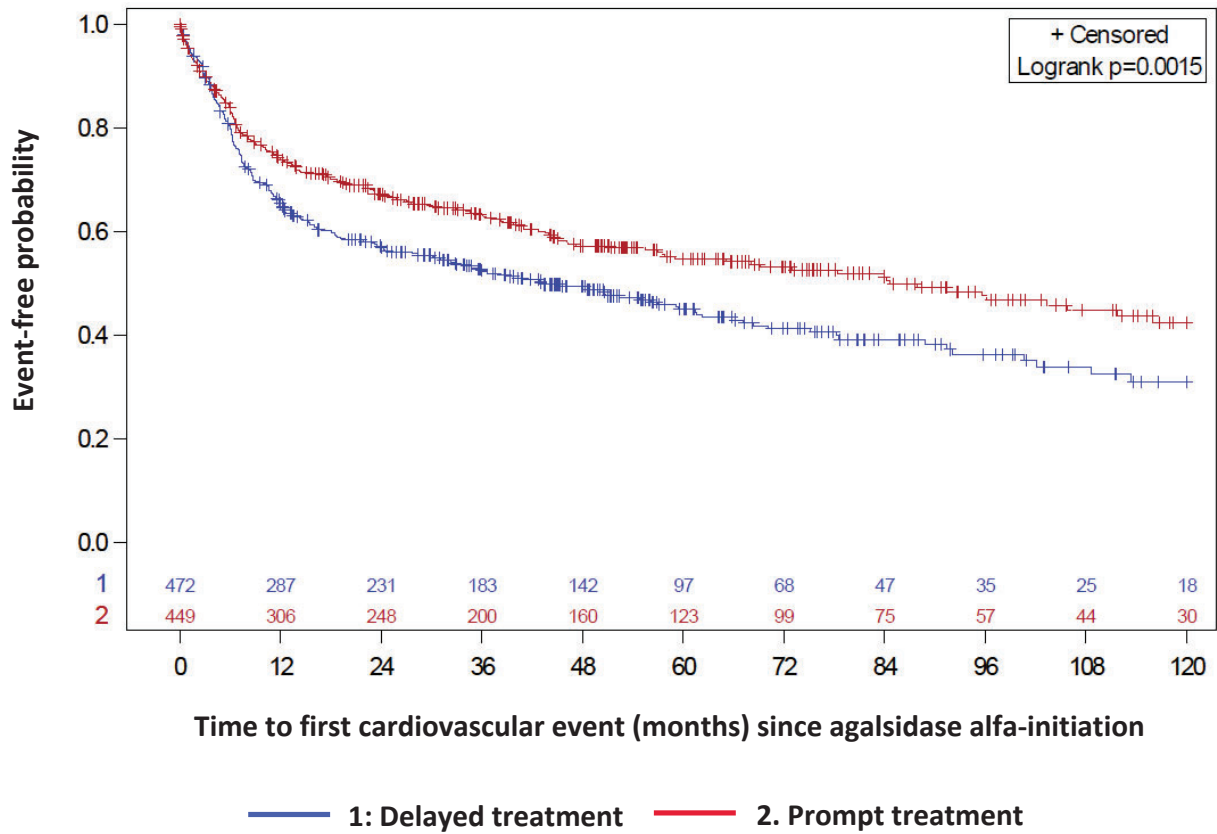

**Supplemental Figure 7.** Kaplan-Meier curves with log-rank test showing time to first renal event according to prompt/delayed agalsidase alfa initiation in male patients (analysis B: treatment time from diagnosis).

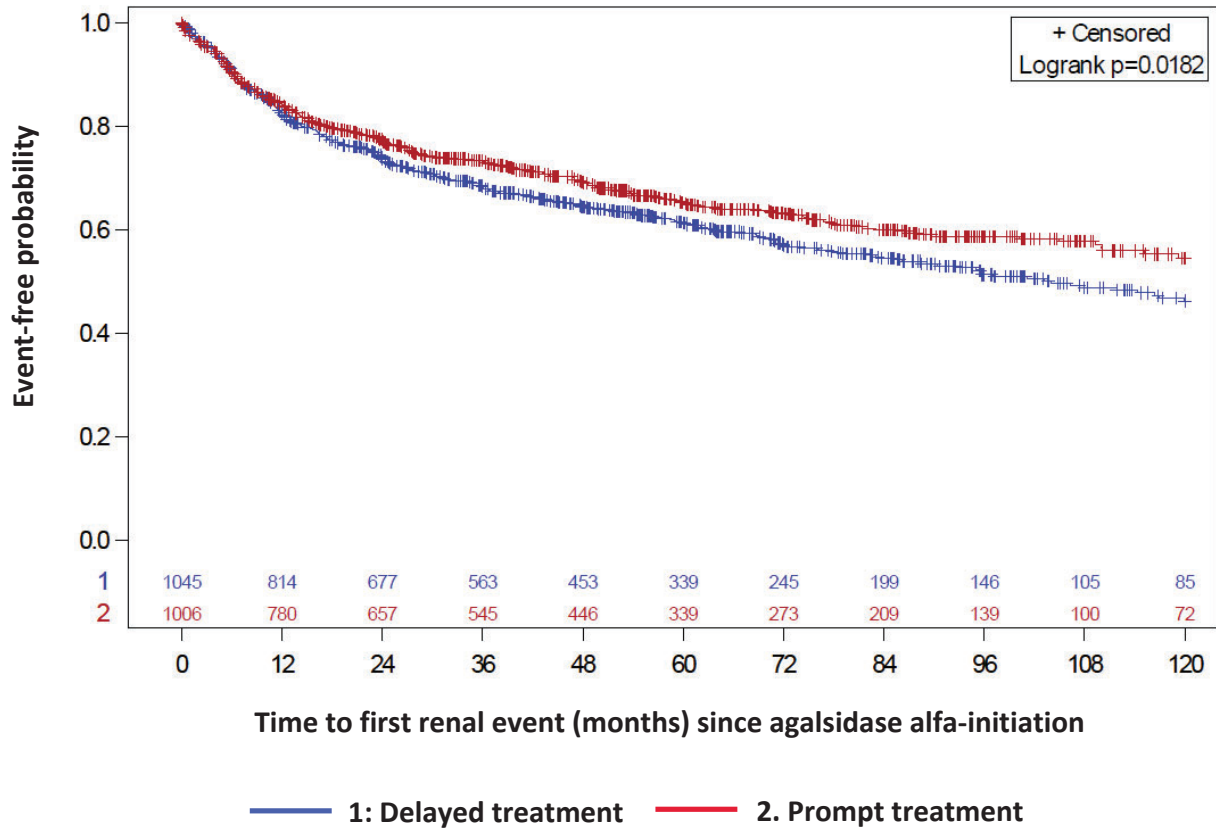

**Supplemental Figure 8.** Kaplan-Meier curves with log-rank test showing time to first renal event according to prompt/delayed agalsidase alfa initiation in female patients (analysis B: treatment time from diagnosis).

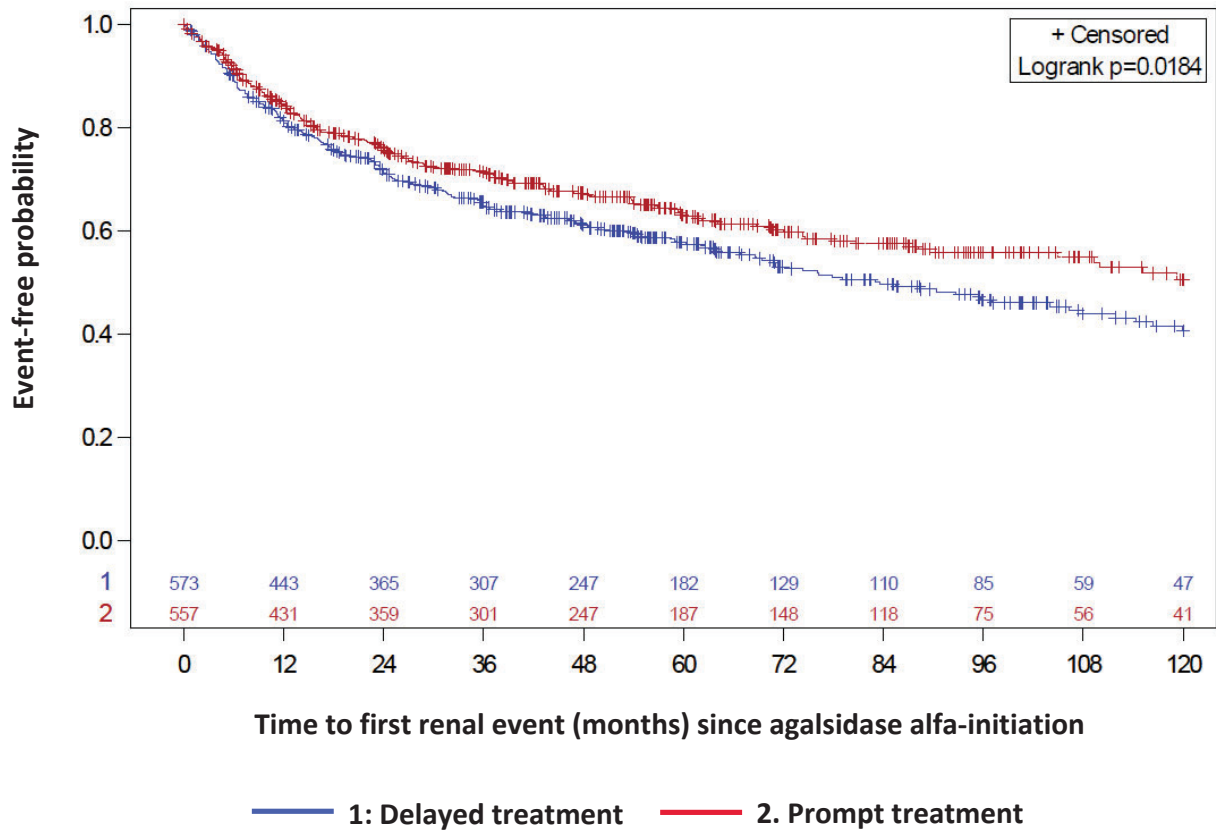

Supplement: Supplementary file 1 [file get_supplementary_file.php]
